# Supplementary material
Source: Springer Nature journal article supplement (https://www.springermedizin.de/resource/supplementary/12874_2012_984_MOESM8_ESM.pdf/9432982)

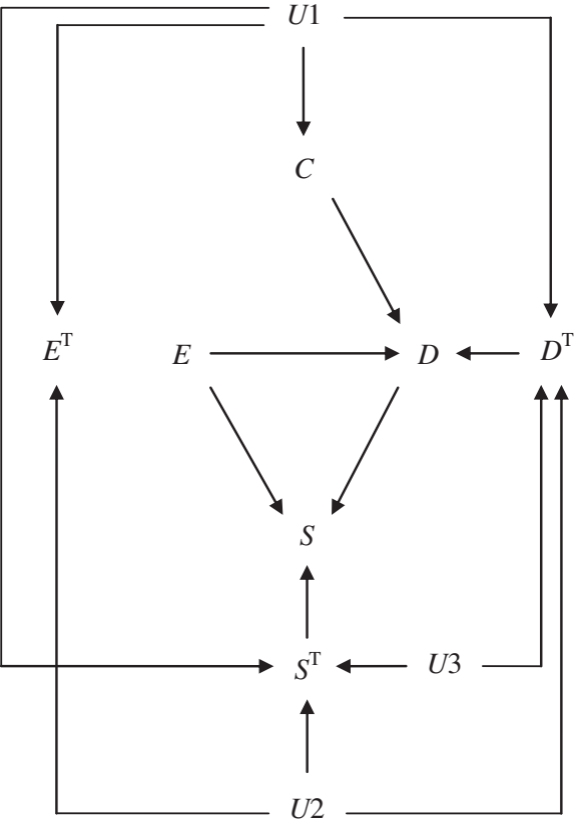

Supplement: MOESM8 [file 9432982]
